# Supplementary material for: Bioactive Diterpenes from the Brazilian Native Plant (Moquiniastrum pulchrum) and Their Application in Weed Control
Source: MDPI journal article supplement (doi:10.3390/molecules26154632), 2021-07-30
Supplement: s1 [file s1]

## *Supporting Information*

### **Bioactive diterpenes from Brazilian native plant (*Moquiniastrum pulchrum*) and their application in weed control.**

**Fatima Vela<sup>†</sup>, Simoni Anese<sup>‡</sup>, Rosa M. Varela<sup>†\*</sup>, Ascensión Torres<sup>†\*</sup>, Jose M. G. Molinillo<sup>†</sup>, Francisco A. Macias<sup>†</sup>**

<sup>†</sup> Allelopathy Group, Department of Organic Chemistry, Institute of Biomolecules (INBIO), Faculty of Science, University of Cadiz, C/ República Saharaui #7, 11510 Puerto Real, (Cádiz), Spain

<sup>‡</sup> Federal Institute of Education, Science and Technology of Mato Grosso - Campus Campo Novo do Parecis, MT 235 Km 12, Campo Novo do Parecis, MT 78360-000, Brazil

\* Author to whom correspondence should be addressed; E-mail: [chon.torres@uca.es](mailto:chon.torres@uca.es); [rosa.varela@uca.es](mailto:rosa.varela@uca.es).

Phone: +34 956 01 27 90; Fax: +34 956 01 62 88.

- S3  $^1\text{H}$  NMR spectrum of moquinian A (4) (500 MHz,  $\text{Cl}_3\text{CD}$ )
- S3  $^{13}\text{C}$  NMR spectrum of moquinian A (4) (125 MHz,  $\text{Cl}_3\text{CD}$ )
- S5  $^1\text{H}$ - $^1\text{H}$  COSY spectrum of moquinian A (4) (125 MHz,  $\text{Cl}_3\text{CD}$ )
- S5 HSQC spectrum of moquinian A (4) (125 MHz,  $\text{Cl}_3\text{CD}$ )
- S7 HMBC spectrum of moquinian A (4) (125 MHz,  $\text{Cl}_3\text{CD}$ )
- S7 TOF MS spectra of moquinian A (4)
- S9  $^1\text{H}$  NMR spectrum of moquinian B (5) (500 MHz, MeOH)
- S9  $^{13}\text{C}$  NMR spectrum of moquinian B (5) (125 MHz, MeOH)
- S10  $^1\text{H}$ - $^1\text{H}$  COSY spectrum of moquinian B (5) (125 MHz, MeOH)
- S10 HSQC spectrum of moquinian B (5) (125 MHz, MeOH)
- S11 HMBC spectrum of moquinian B (5) (125 MHz, MeOH)
- S11 TOF MS spectra of moquinian B (5)

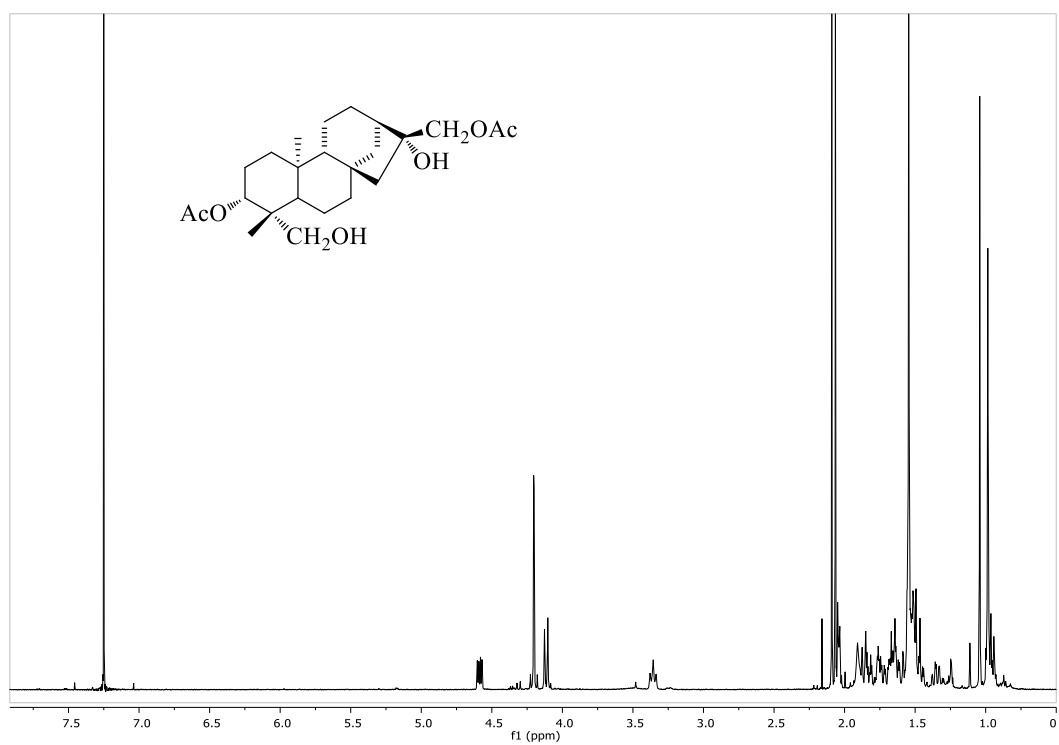

$^1\text{H}$  NMR spectrum of moquinian A (4) (500 MHz,  $\text{CDCl}_3$ )

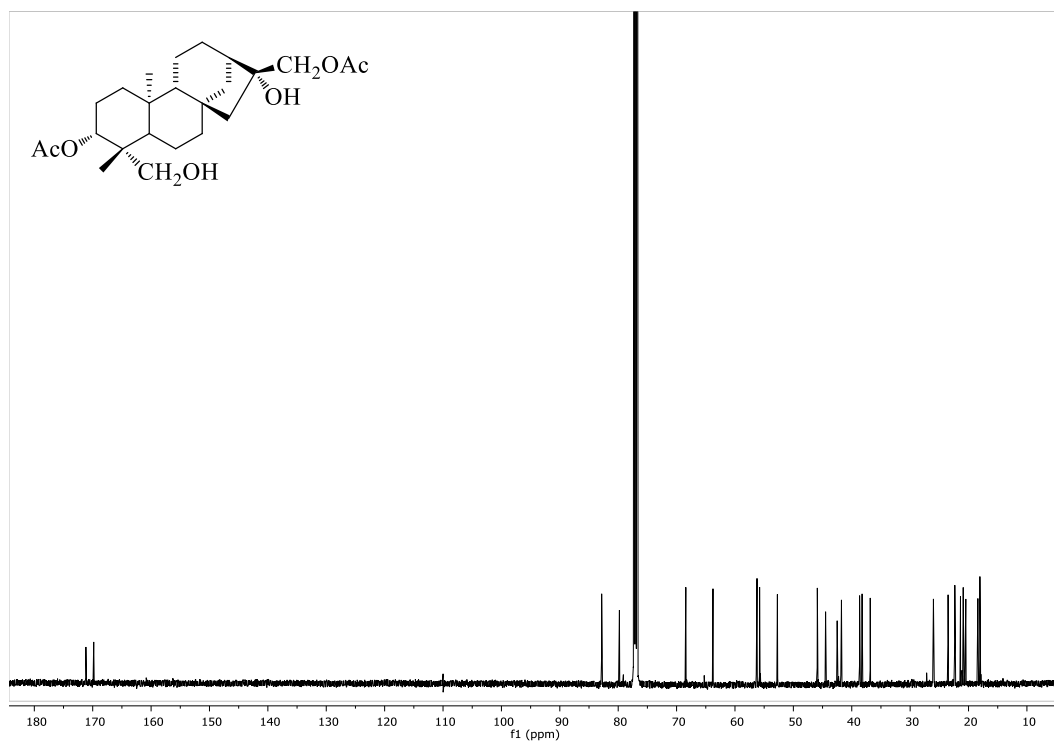

$^{13}\text{C}$  NMR spectrum of moquinian A (4) (125 MHz,  $\text{CDCl}_3$ )

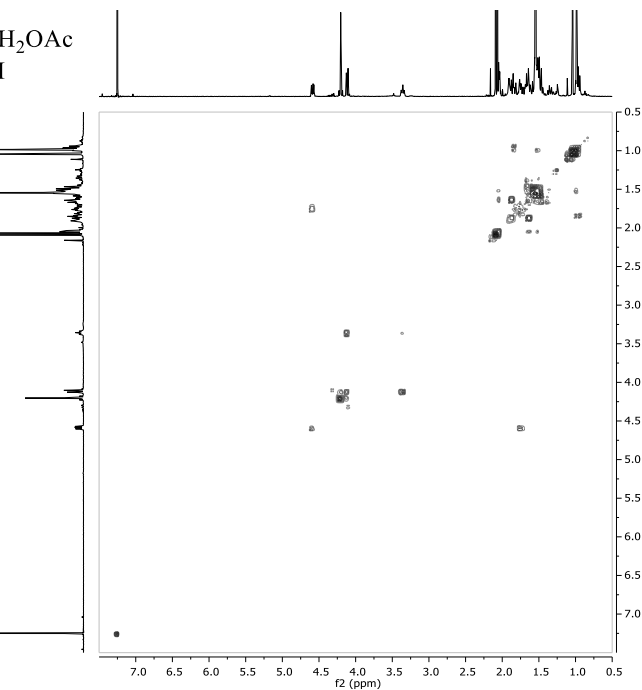

**$^1\text{H}$ - $^1\text{H}$  COSY spectrum of moquinian A (4) (125 MHz,  $\text{Cl}_3\text{CD}$ )**

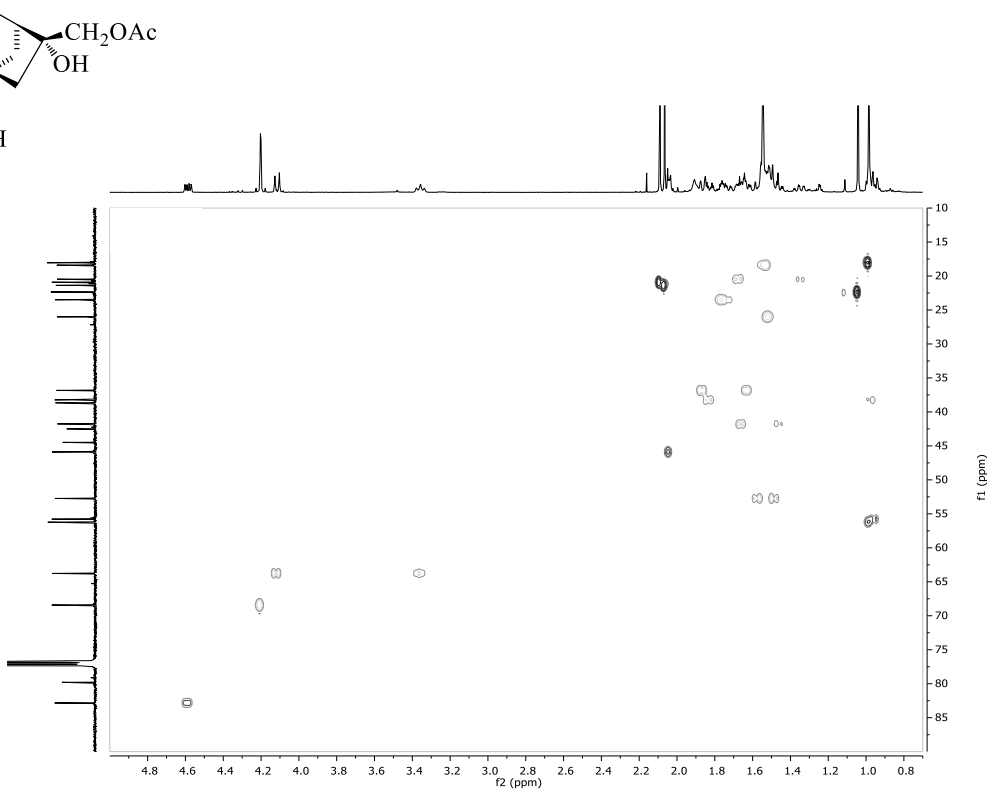

HSQC spectrum of moquinian A (4) (125 MHz,  $\text{Cl}_3\text{CD}$ )

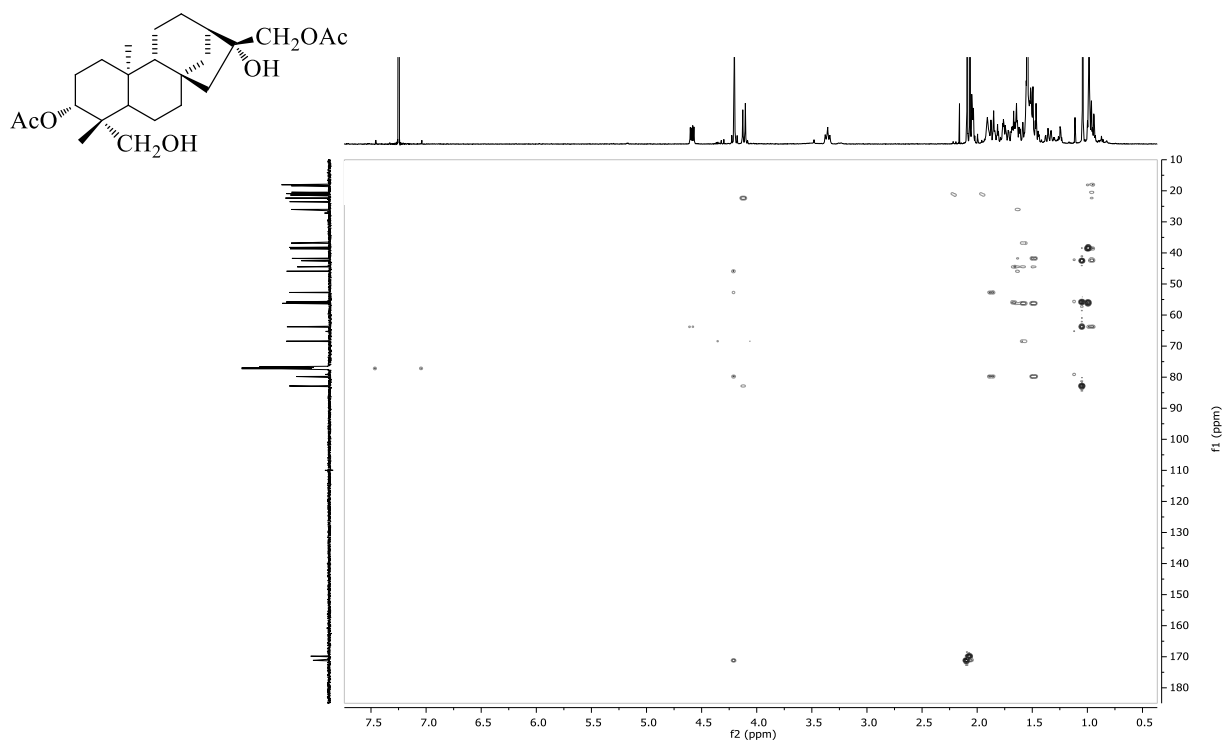

HMBC spectrum of moquinian A (4) (125 MHz, Cl<sub>3</sub>CD)

#### Single Mass Analysis

Tolerance = 1.0 mDa / DBE: min = -1.5, max = 80.0

Element prediction: Off

Number of isotope peaks used for i-FIT = 3

Monoisotopic Mass, Even Electron Ions

173 formula(e) evaluated with 1 results within limits (up to 10 best isotopic matches for each mass)

Elements Used:

C: 0-100 H: 0-100 O: 0-20 Na: 0-1

chcn

d4-d11 496 (4.590)

1: TOF MS ES+  
4.98e+006

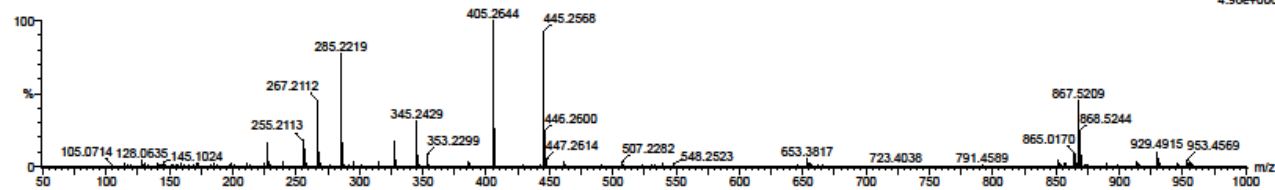

Minimum: -1.5  
Maximum: 1.0 10.0 80.0

| Mass     | Calc. Mass | mDa | PFM | DBE | i-FIT  | Norm | Conf(%) | Formula                                           |
|----------|------------|-----|-----|-----|--------|------|---------|---------------------------------------------------|
| 445.2568 | 445.2566   | 0.2 | 0.4 | 5.5 | 1233.5 | n/a  | n/a     | C <sub>24</sub> H <sub>38</sub> O <sub>6</sub> Na |

TOF MS spectrum of moquinian A (4)

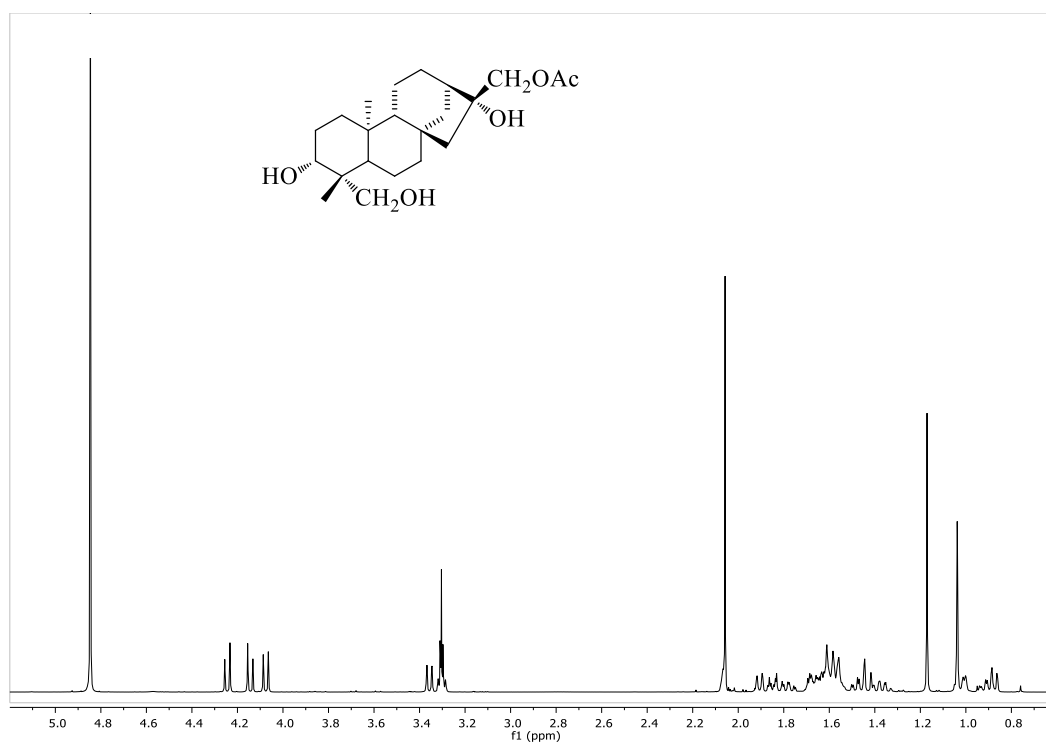

**<sup>1</sup>H NMR spectrum of moquinian B (5) (500 MHz, MeOH)**

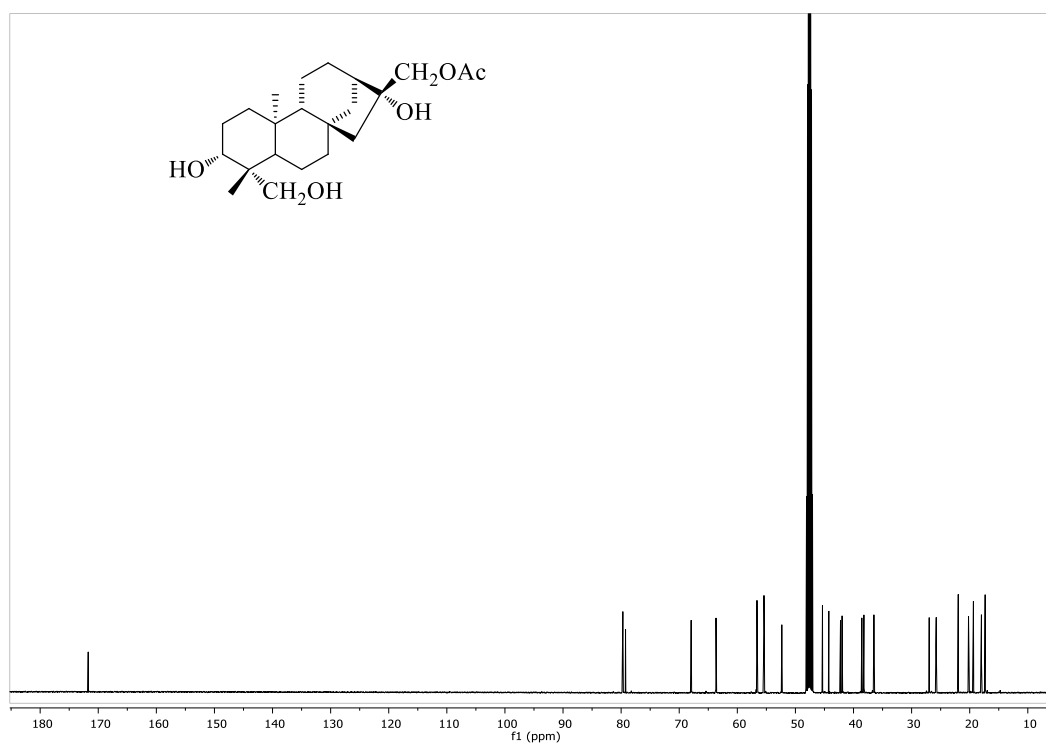

**<sup>13</sup>C NMR spectrum of moquinian B (5) (125 MHz, MeOH)**

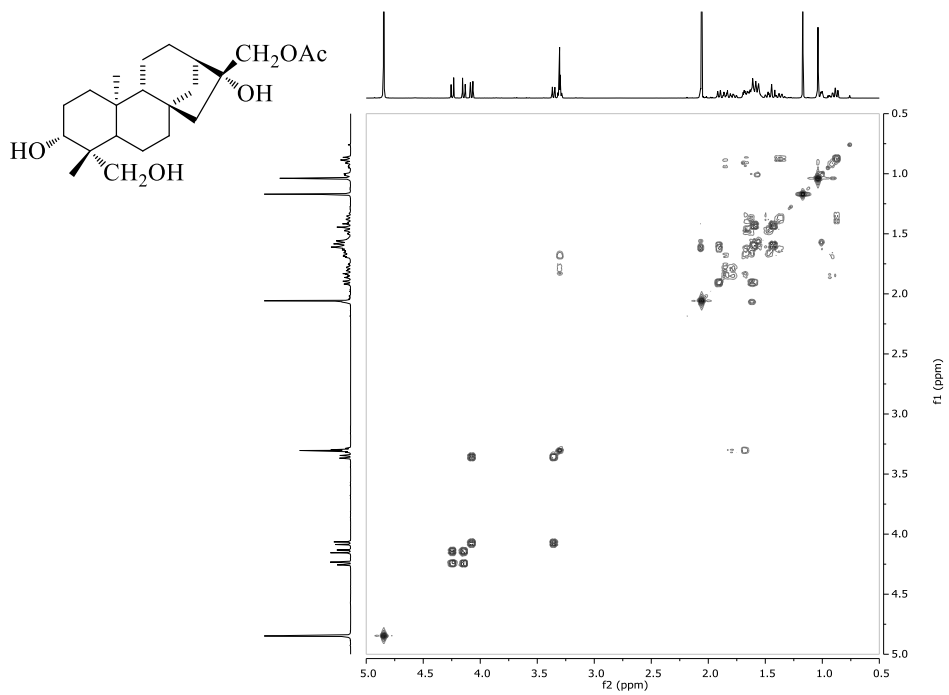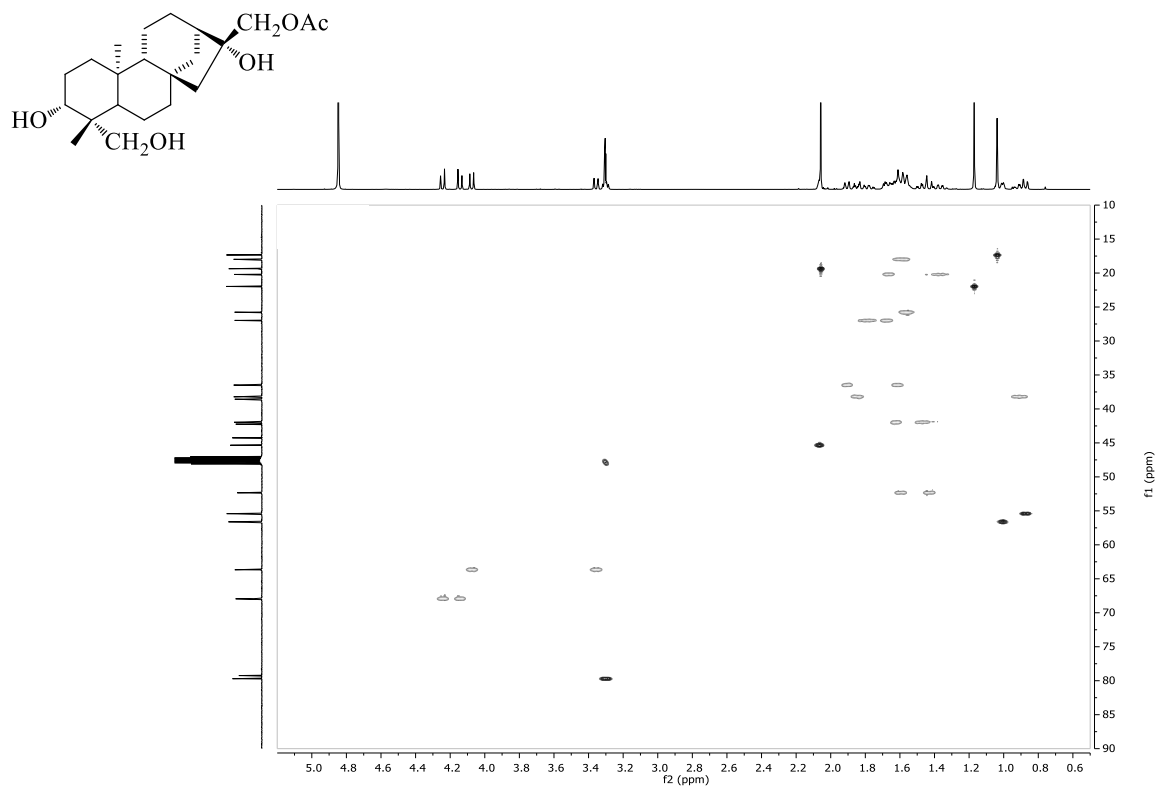

HSQC spectrum of moquinian B (5) (125 MHz, MeOH)

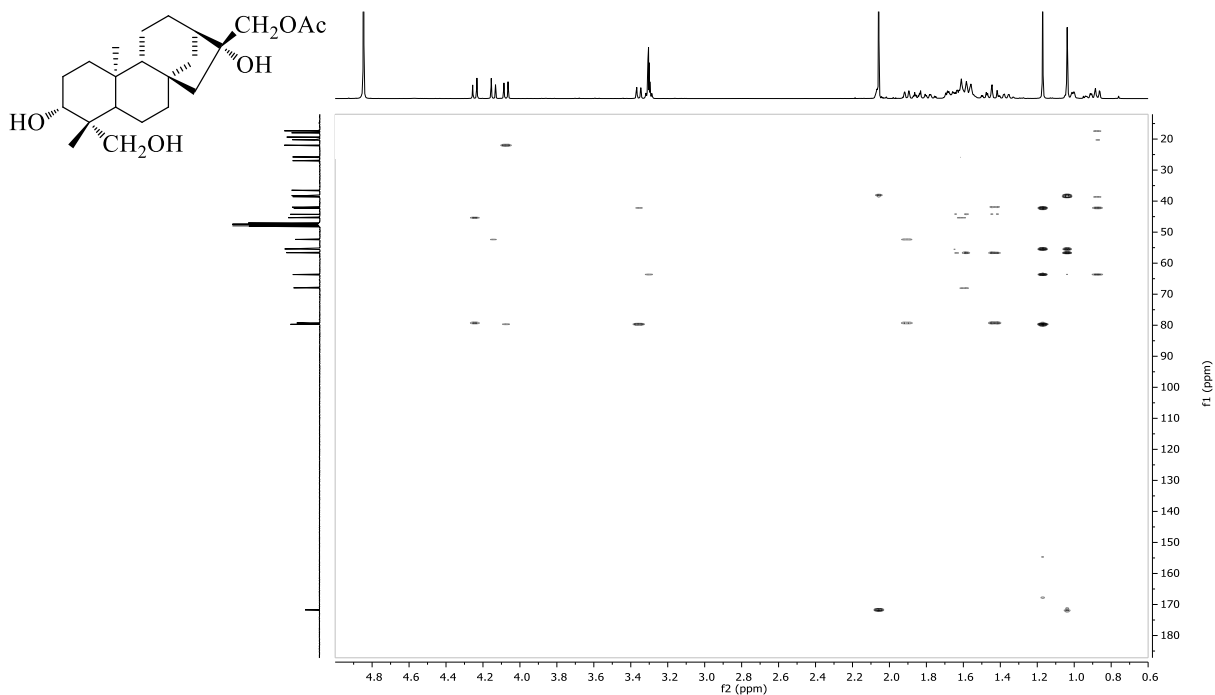

HMBC spectrum of moquinian B (5) (125 MHz, MeOH)

#### Single Mass Analysis

Tolerance = 1.0 mDa / DBE: min = -1.5, max = 80.0

Element prediction: Off

Number of isotope peaks used for i-FIT = 3

Monoisotopic Mass, Even Electron Ions

159 formula(e) evaluated with 1 results within limits (up to 10 best isotopic matches for each mass)

Elements Used:

C: 0-100 H: 0-100 O: 0-20 Na: 0-1

chon

d5-dl1 433 (4.016)

1: TOF MS ES+  
3.24e+006

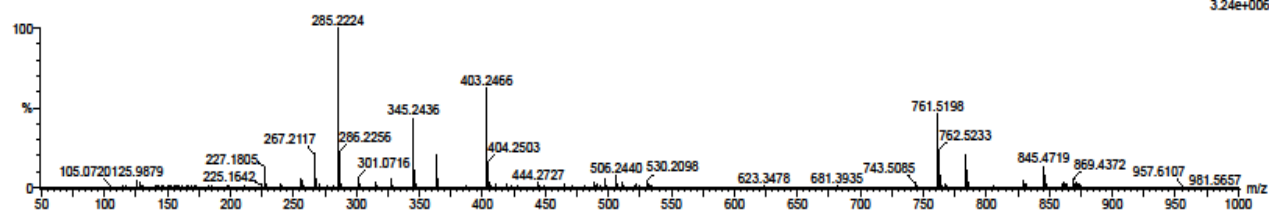

Minimum: -1.5  
Maximum: 1.0 10.0 80.0

| Mass     | Calc. Mass | mDa | PPM | DBE | i-FIT  | Norm | Conf(%) | Formula       |
|----------|------------|-----|-----|-----|--------|------|---------|---------------|
| 403.2466 | 403.2460   | 0.6 | 1.5 | 4.5 | 1266.1 | n/a  | n/a     | C22 H36 O5 Na |

TOF MS spectra of moquinian B (5)
